# Supplementary material for: Spontaneous destructive periodontitis and skeletal bone damage in transgenic mice carrying a human shared epitope-coding HLA-DRB1 allele
Source: PubMed Central journal article supplement — RMD Open. 2016 Dec 1;2(2):e000349. doi: 10.1136/rmdopen-2016-000349 (PMC5133411; doi:10.1136/rmdopen-2016-000349), 2016-12-01
Supplement: rmdopen-2016-000349supp_tables.pdf [file rmdopen-2016-000349supp_tables.pdf]

**Supplemental Table I. Summary of mandibular and maxillary micro-CT parameters (Mean  $\pm$ SEM)**

| <b>Groups</b>    | <b>BV</b><br>(mm <sup>3</sup> ) | <b><i>p</i></b> | <b>BVF</b><br>(mm <sup>3</sup> ) | <b><i>p</i></b> | <b>BMD</b><br>(mgHA/mm <sup>3</sup> ) | <b><i>p</i></b> | <b>TMD</b><br>(mgHA/mm <sup>3</sup> ) | <b><i>p</i></b> | <b>BMC</b><br>(mgHA) | <b><i>p</i></b> | <b>TMC</b><br>(mgHA) | <b><i>p</i></b> |
|------------------|---------------------------------|-----------------|----------------------------------|-----------------|---------------------------------------|-----------------|---------------------------------------|-----------------|----------------------|-----------------|----------------------|-----------------|
| <b>Male</b>      |                                 |                 |                                  |                 |                                       |                 |                                       |                 |                      |                 |                      |                 |
| <b>Mandibles</b> |                                 |                 |                                  |                 |                                       |                 |                                       |                 |                      |                 |                      |                 |
| 0401             | 0.09 $\pm$ 0.02                 | <b>0.008</b>    | 0.14 $\pm$ 0.03                  | <b>0.003</b>    | 225.2 $\pm$ 38.57                     | <b>0.0004</b>   | 948.2 $\pm$ 36.30                     | <b>0.004</b>    | 146.7 $\pm$ 28.18    | <b>0.002</b>    | 96.31 $\pm$ 27.58    | <b>0.005</b>    |
| 0402             | 0.17 $\pm$ 0.004                |                 | 0.28 $\pm$ 0.009                 |                 | 405.5 $\pm$ 8.008                     |                 | 1075 $\pm$ 7.24                       |                 | 255.7 $\pm$ 6.38     |                 | 190.6 $\pm$ 6.184    |                 |
| <b>Female</b>    |                                 |                 |                                  |                 |                                       |                 |                                       |                 |                      |                 |                      |                 |
| <b>Mandibles</b> |                                 |                 |                                  |                 |                                       |                 |                                       |                 |                      |                 |                      |                 |
| 0401             | 0.18 $\pm$ 0.008                | 0.66            | 0.31 $\pm$ 0.01                  | 0.51            | 425.2 $\pm$ 17.34                     | 0.34            | 1002 $\pm$ 8.24                       | <b>0.0001</b>   | 258.1 $\pm$ 8.17     | <b>0.02</b>     | 187.1 $\pm$ 9.39     | 0.06            |
| 0402             | 0.19 $\pm$ 0.005                |                 | 0.30 $\pm$ 0.009                 |                 | 446.0 $\pm$ 12.39                     |                 | 1110 $\pm$ 13.89                      |                 | 282.2 $\pm$ 5.58     |                 | 211.3 $\pm$ 7.61     |                 |
| <b>Male</b>      |                                 |                 |                                  |                 |                                       |                 |                                       |                 |                      |                 |                      |                 |
| <b>Maxillae</b>  |                                 |                 |                                  |                 |                                       |                 |                                       |                 |                      |                 |                      |                 |
| 0401             | 0.05 $\pm$ 0.02                 | 0.21            | 0.09 $\pm$ 0.04                  | 0.19            | 163.8 $\pm$ 50.15                     | 0.15            | 923.2 $\pm$ 39.73                     | <b>0.0009</b>   | 82.10 $\pm$ 26.39    | 0.17            | 50.95 $\pm$ 21.92    | 0.17            |
| 0402             | 0.092 $\pm$ 0.02                |                 | 0.18 $\pm$ 0.04                  |                 | 283.3 $\pm$ 60.84                     |                 | 1096 $\pm$ 10.77                      |                 | 139.3 $\pm$ 30.59    |                 | 101.5 $\pm$ 27.64    |                 |
| <b>Female</b>    |                                 |                 |                                  |                 |                                       |                 |                                       |                 |                      |                 |                      |                 |
| <b>Maxillae</b>  |                                 |                 |                                  |                 |                                       |                 |                                       |                 |                      |                 |                      |                 |
| 0401             | 0.15 $\pm$ 0.007                | 0.67            | 0.32 $\pm$ 0.02                  | 0.99            | 446.9 $\pm$ 31.77                     | 0.77            | 1068 $\pm$ 18.19                      | <b>0.02</b>     | 208.6 $\pm$ 11.29    | 0.49            | 162.9 $\pm$ 11.40    | 0.45            |
| 0402             | 0.15 $\pm$ 0.01                 |                 | 0.32 $\pm$ 0.02                  |                 | 459.3 $\pm$ 27.14                     |                 | 1121 $\pm$ 8.88                       |                 | 221.5 $\pm$ 14.27    |                 | 176.2 $\pm$ 12.79    |                 |

**Supplemental Table II. Linear CEJ-ABC distances (Mean  $\pm$ SEM)**

| <b>Groups</b>      | <b>0401</b>     | <b>0402</b>      | <b><i>p</i></b> |
|--------------------|-----------------|------------------|-----------------|
| Male - Mandibles   | 0.57 $\pm$ 0.11 | 0.36 $\pm$ 0.03  | 0.08            |
| Female - Mandibles | 0.35 $\pm$ 0.03 | 0.29 $\pm$ 0.009 | 0.13            |
| Male - Maxillae    | 0.59 $\pm$ 0.08 | 0.46 $\pm$ 0.08  | 0.31            |
| Female - Maxillae  | 0.20 $\pm$ 0.01 | 0.26 $\pm$ 0.03  | 0.12            |

**Supplemental Table III. Tibial trabecular bone parameters (Mean ±SEM)**

| <b>Groups</b>  | <b>BV/TV</b> | <b><i>p</i></b> | <b>BS/BV</b> | <b><i>p</i></b> | <b>Tb.Th.</b> | <b><i>p</i></b> | <b>Tb.N.</b> | <b><i>p</i></b> | <b>Tb.Sp.</b> | <b><i>p</i></b> |
|----------------|--------------|-----------------|--------------|-----------------|---------------|-----------------|--------------|-----------------|---------------|-----------------|
| <b>Males</b>   |              |                 |              |                 |               |                 |              |                 |               |                 |
| 0401           | 0.07±0.01    | 0.28            | 66.41±4.73   | 0.58            | 0.03±0.002    | 0.69            | 2.30±0.45    | 0.21            | 0.48±0.13     | 0.22            |
| 0402           | 0.09±0.01    |                 | 63.92±1.13   |                 | 0.03±0.000    |                 | 3.03±0.30    |                 | 0.31±0.03     |                 |
| <b>Females</b> |              |                 |              |                 |               |                 |              |                 |               |                 |
| 0401           | 0.06±0.008   | 0.59            | 62.69±2.21   | 0.23            | 0.03±0.001    | 0.22            | 1.97±0.21    | 0.33            | 0.50±0.06     | 0.35            |
| 0402           | 0.07±0.01    |                 | 66.40±1.86   |                 | 0.03±0.002    |                 | 2.34±0.29    |                 | 0.42±0.04     |                 |

BV/TV, bone volume density; BS/BV, specific bone surface; Tb.Th, trabecular thickness; Tb.N, trabecular number; Tb.Sp, trabecular spacing
